# Supplementary material
Source: PubMed Central journal article supplement (PMC4704203)
Supplement: AAC.02157-15_zac001164703so1.pdf [file AAC.02157-15_zac001164703so1.pdf]

**SUPPLEMENTARY TABLE A1** Multilocus sequence typing data of clinical isolates

| Strain  | DST  | AAT1a | ACC1 | ADP1 | MPIb | SYA1 | VPS13 | ZWF1b | Clade | S |
|---------|------|-------|------|------|------|------|-------|-------|-------|---|
| DSY281  | 408  | 2     | 5    | 5    | 2    | 2    | 20    | 5     | 1     |   |
| DSY284  | 408  | 2     | 5    | 5    | 2    | 2    | 20    | 5     | 1     |   |
| DSY347  | 309  | 13    | 10   | 45   | 6    | 7    | 32    | 15    | 3     |   |
| DSY288  | 309  | 13    | 10   | 45   | 6    | 7    | 32    | 15    | 3     |   |
| DSY289  | 309  | 13    | 10   | 45   | 6    | 7    | 32    | 15    | 3     |   |
| DSY348  | 309  | 13    | 10   | 45   | 6    | 7    | 32    | 15    | 3     |   |
| DSY290  | 1158 | 8     | 14   | 16   | 9    | 129  | 20    | 157   |       | S |
| DSY291  | 1158 | 8     | 14   | 16   | 9    | 129  | 20    | 157   |       | S |
| DSY292  | 1159 | 8     | 14   | 16   | 9    | 129  | 20    | 81    |       | S |
| DSY294  | 461  | 60    | 10   | 21   | 1    | 7    | 11    | 15    | 11    |   |
| DSY296  | 461  | 60    | 10   | 21   | 1    | 7    | 11    | 15    | 11    |   |
| DSY2321 | 1259 | 2     | 2    | 2    | 12   | 2    | 5     | 5     | 1     |   |
| DSY2322 | 1259 | 2     | 2    | 2    | 12   | 2    | 5     | 5     | 1     |   |
| DSY2323 | 1259 | 2     | 2    | 2    | 12   | 2    | 5     | 5     | 1     |   |
| DSY731  | 1260 | 13    | 75   | 11   | 6    | 7    | 32    | 105   | 3     |   |
| DSY732  | 1261 | 13    | 19   | 86   | 6    | 7    | 32    | 40    | 3     |   |
| DSY735  | 1261 | 13    | 19   | 86   | 6    | 7    | 32    | 40    | 3     |   |
| DSY544  | 1161 | 2     | 2    | 5    | 9    | 2    | 68    | 5     | 1     |   |
| DSY775  | 1161 | 2     | 2    | 5    | 9    | 2    | 68    | 5     | 1     |   |

|         |      |    |    |    |    |     |     |    |    |
|---------|------|----|----|----|----|-----|-----|----|----|
| DSY2309 | 1203 | 62 | 12 | 21 | 4  | 6   | 30  | 4  | 11 |
| DSY750  | 1203 | 62 | 12 | 21 | 4  | 6   | 30  | 4  | 11 |
| DSY751  | 1203 | 62 | 12 | 21 | 4  | 6   | 30  | 4  | 11 |
| DSY2243 | 1195 | 21 | 3  | 5  | 18 | 72  | 102 | 84 | 6  |
| DSY2242 | 1195 | 21 | 3  | 5  | 18 | 72  | 102 | 84 | 6  |
| DSY2284 | 1201 | 62 | 72 | 21 | 1  | 130 | 183 | 4  | 11 |
| DSY2285 | 1201 | 62 | 72 | 21 | 1  | 130 | 183 | 4  | 11 |
| DSY550  | 309  | 13 | 10 | 45 | 6  | 7   | 32  | 15 | 3  |
| DSY551  | 309  | 13 | 10 | 45 | 6  | 7   | 32  | 15 | 3  |
| DSY520  | 1160 | 8  | 3  | 5  | 55 | 2   | 5   | 5  | 1  |
| DSY522  | 1160 | 8  | 3  | 5  | 55 | 2   | 5   | 5  | 1  |
| DSY2250 | 1199 | 2  | 5  | 5  | 2  | 2   | 27  | 16 | 1  |
| DSY2251 | 1200 | 2  | 2  | 5  | 2  | 2   | 27  | 16 | 1  |
| DSY741  | 804  | 2  | 3  | 2  | 2  | 2   | 20  | 5  | 1  |
| DSY742  | 66   | 2  | 3  | 5  | 2  | 2   | 6   | 5  | 1  |

---

Data were generated according to published recommendations (1). Clade assignments were performed according to methods described by Odds et al (2).

DST, diploid sequence type; S, singleton.

**SUPPLEMENTARY FIG A1** Correlations between relative MIC increases caused by *ERG11* mutations.

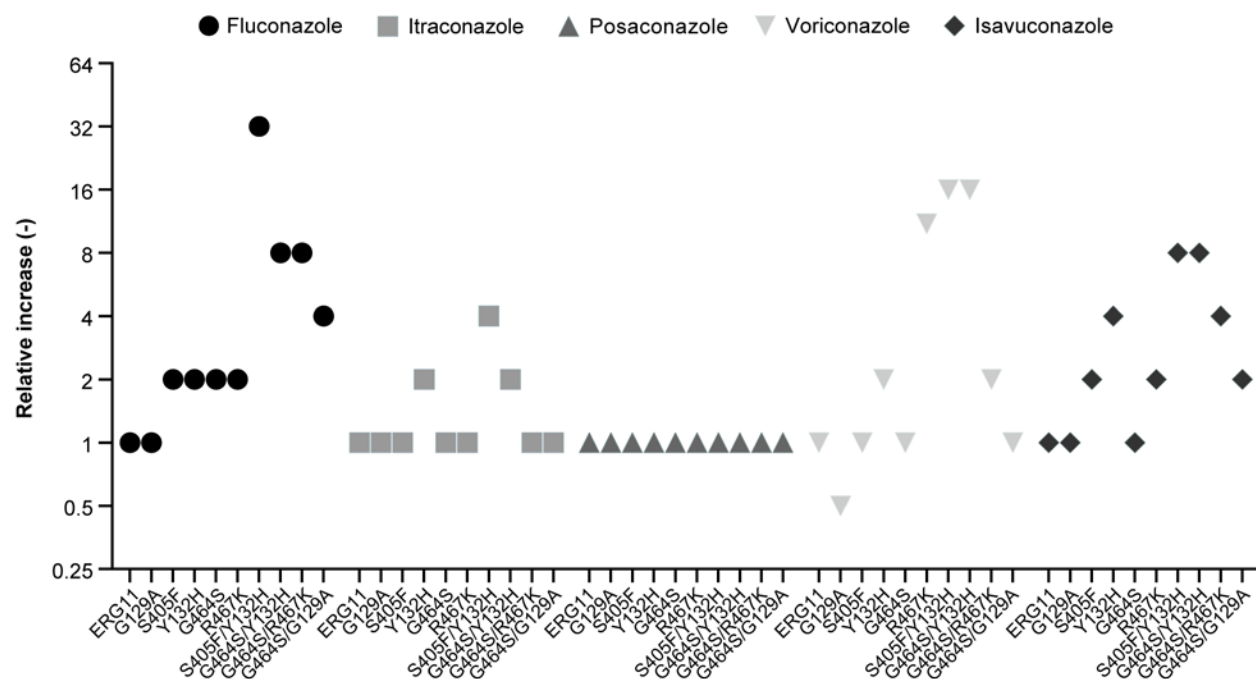

Correlation *P* values

|               | Fluconazole | Itraconazole | Posaconazole | Voriconazole | Isavuconazole |
|---------------|-------------|--------------|--------------|--------------|---------------|
| Fluconazole   |             | 0.0003       |              | 0.032        | 0.010         |
| Itraconazole  | 0.0003      |              |              | 0.022        | 0.003         |
| Posaconazole  |             |              |              |              |               |
| Voriconazole  | 0.0325      | 0.0219       |              |              | 0.003         |
| Isavuconazole | 0.0104      | 0.0035       |              | 0.003        |               |

Values were obtained from Table 3. The data were processed by GraphPad Prism 6 software. Correlations were evaluated by *P* values detailed at the bottom of the Figure. The correlation matrix was obtained by 2-tailed parametric Pearson tests. *P* value  $\leq 0.05$  indicates significant correlation.

**SUPPLEMENTARY FIG A2** Correlations between relative MIC increases caused by azole resistance in *C. albicans* isolates.

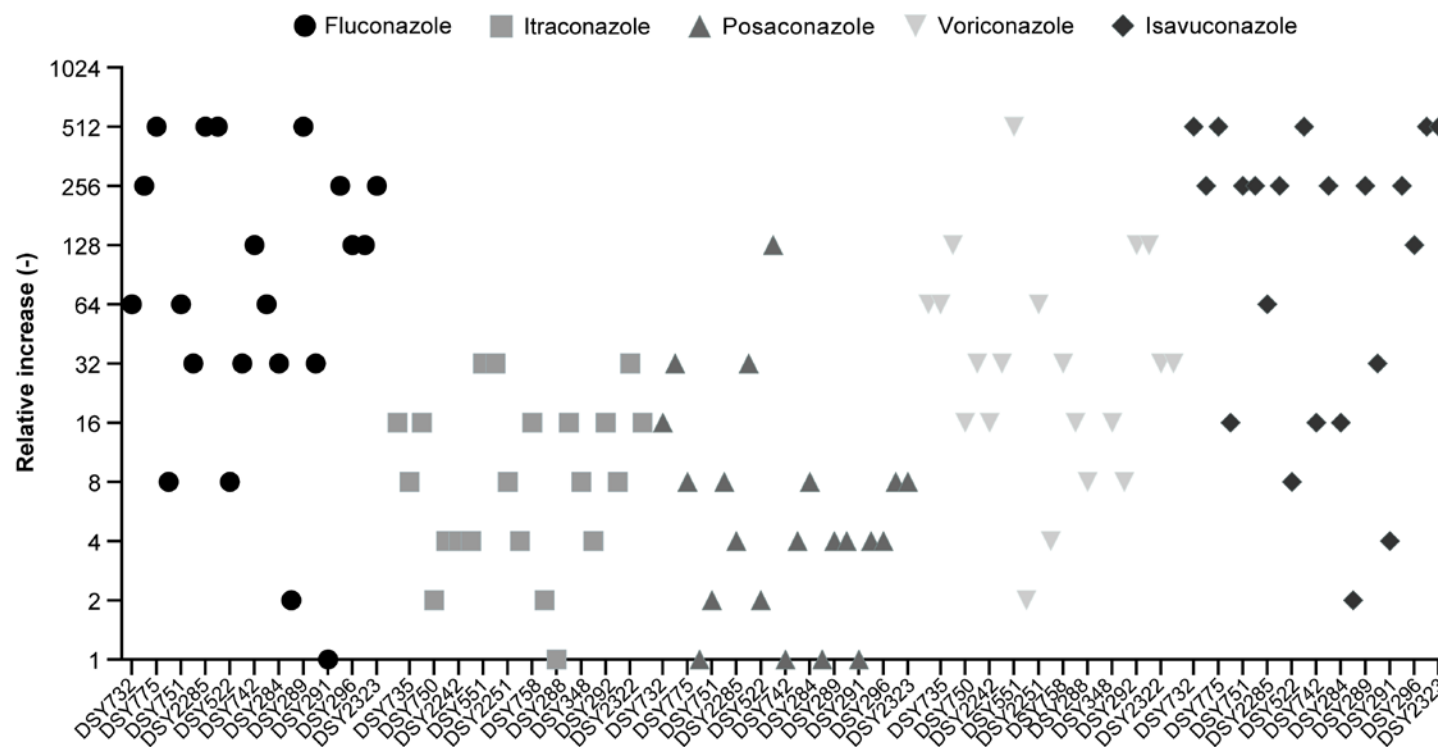

**Correlation P values**

|               | Fluconazole | Itraconazole | Posaconazole | Voriconazole | Isavuconazole |
|---------------|-------------|--------------|--------------|--------------|---------------|
| Fluconazole   |             | 0.160        | 0.885        | 0.002        | 0.206         |
| Itraconazole  | 0.160       |              | 0.904        | 0.171        | 0.056         |
| Posaconazole  | 0.885       | 0.904        |              | 0.907        | 0.049         |
| Voriconazole  | 0.002       | 0.171        | 0.907        |              | 0.559         |
| Isavuconazole | 0.206       | 0.056        | 0.049        | 0.559        |               |

Values were obtained from Table 5. The data were processed by Graph Prism 6 software. Correlations were evaluated by *P* values detailed at the bottom of the Figure. The correlation matrix was obtained by 2-tailed parametric Pearson tests. *P* value  $\leq 0.05$  indicates significant correlation.

**SUPPLEMENTARY FIG A3** Correlations between relative MIC increases caused by azole resistance in *C. glabrata* isolates

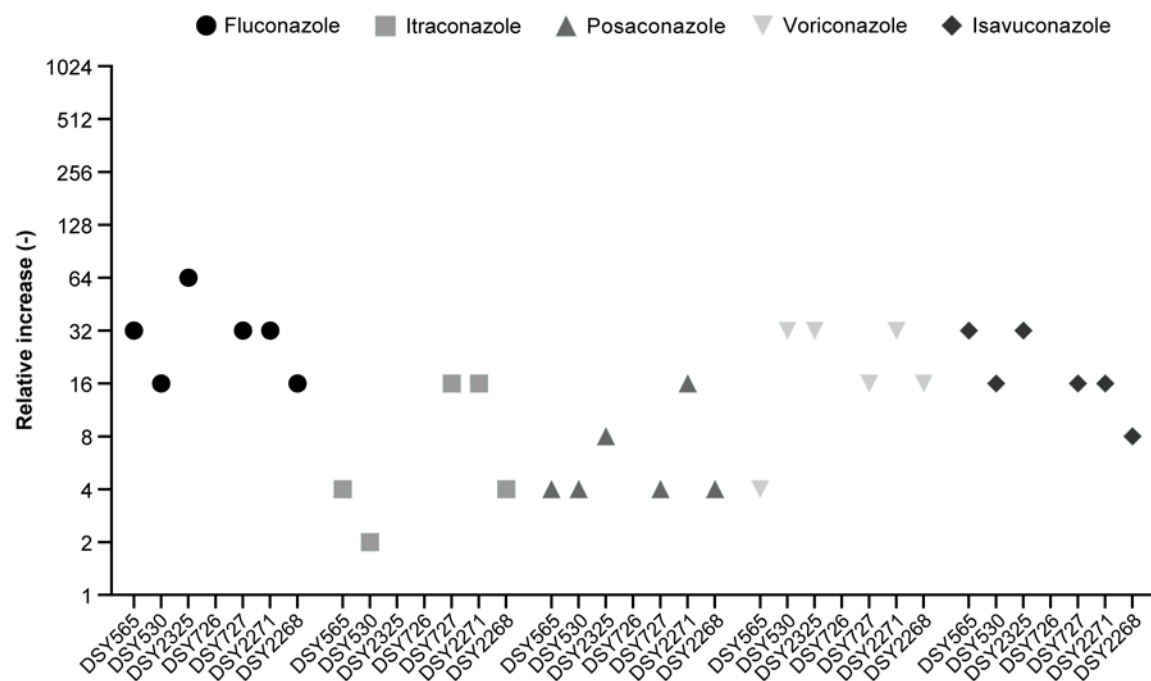

Correlation *P* values

|               | Fluconazole | Itraconazole | Posaconazole | Voriconazole | Isavuconazole |
|---------------|-------------|--------------|--------------|--------------|---------------|
| Fluconazole   |             | 0.800        | 0.262        | 0.234        | 0.018         |
| Itraconazole  | 0.800       |              | 0.192        | 0.659        | 0.935         |
| Posaconazole  | 0.262       | 0.192        |              | 0.095        | 0.515         |
| Voriconazole  | 0.234       | 0.659        | 0.095        |              | 0.512         |
| Isavuconazole | 0.018       | 0.935        | 0.515        | 0.512        |               |

Values were obtained from Table 6. The data were processed by Graph Prism 6 software. Correlations were evaluated by *P* values detailed at the bottom of the Figure. The correlation matrix was obtained by 2-tailed parametric Pearson tests. *P* value  $\leq 0.05$  indicates significant correlation.

## SUPPLEMENTARY REFERENCES

1. **Bougnoux M-E, Tavanti A, Bouchier C, Gow NAR, Magnier A, Davidson AD, Maiden MCJ, d'Enfert C, Odds FC.** 2003. Collaborative consensus for optimized multilocus sequence typing of *Candida albicans*. *J Clin Microbiol* **41**:5265-5266.
2. **Odds FC, Bougnoux M-E, Shaw DJ, Bain JM, Davidson AD, Diogo D, Jacobsen MD, Lecomte M, Li S-Y, Tavanti A, Maiden MCJ, Gow NAR, d'Enfert C.** 2007. Molecular phylogenetics of *Candida albicans*. *Eukaryot Cell* **6**:1041-1052.
